1 **Bayesian species distribution models integrate presence-only and presence-absence data**  
2 **to predict deer distribution and relative abundance.**

3 Virginia Morera-Pujol<sup>1</sup>, Philip S. Mostert<sup>2</sup>, Kilian Murphy<sup>1</sup>, Tim Burkitt<sup>3</sup>, Barry Coad<sup>4</sup>, Barry

4 J. McMahon<sup>5</sup>, Maarten Nieuwenhuis<sup>6</sup>, Kevin Morelle<sup>7,8</sup>, Alastair Ward<sup>9</sup>, Simone Ciuti<sup>1</sup>

5 *1 - Laboratory of Wildlife Ecology and Behaviour, School of Biology and Environmental Science,*  
6 *University College Dublin, Dublin, Ireland*

7 *2 - Department of Mathematical Sciences, NTNU Norwegian University of Science and Technology,*  
8 *Gløshaugen, Norway*

9 *3 - Deer Biologist and Management Consultant, DEER MANAGEMENT SOLUTIONS, Coolies,*  
10 *Muckcross, Killarney, Co. Kerry V93R380*

11 *4 - Coillte Forest, Coillte, Dublin Road, Newtownmountkennedy, Co Wicklow, Ireland A63 DN25*

12 *5 - UCD School of Agriculture & Food Science, University College Dublin, Belfield, Dublin, Ireland*

13 *6 - UCD Forestry, School of Agriculture and Food Science, University College Dublin, Belfield,*  
14 *Dublin, Ireland*

15 *7 - Department of Migration, Max Planck Institute of Animal Behaviour, Radolfzell, Germany*

16 *8 - Department of Game Management and Wildlife Biology, Czech University of Life Science, Prague,*  
17 *Czech Republic*

18 *9 - School of Biology, University of Leeds, Leeds, LS2 9JT.*

19

## 20 **Abstract**

21 The use of georeferenced information on the presence of a species to predict its distribution  
22 across a geographic area is one of the most common tools in management and conservation.  
23 The collection of high-quality presence-absence data through structured surveys is, however,  
24 expensive, and managers usually have more abundant low-quality presence-only data  
25 collected by citizen scientists, opportunistic observations, and culling returns for game  
26 species. Integrated Species Distribution Models (ISDMs) have been developed to make the  
27 most of the data available by combining the higher-quality, but usually less abundant and  
28 more spatially restricted presence-absence data, with the lower quality, unstructured, but  
29 usually more extensive and abundant presence-only data. Joint-likelihood ISDMs can be run  
30 in a Bayesian context using INLA (Integrated Nested Laplace Approximation) methods that  
31 allow the addition of a spatially structured random effect to account for data spatial  
32 autocorrelation. These models, however, have only been applied to simulated data so far.  
33 Here, for the first time, we apply this approach to empirical data, using presence-absence and  
34 presence-only data for the three main deer species in Ireland: red, fallow and sika deer. We  
35 collated all deer data available for the past 15 years and fitted models predicting distribution  
36 and relative abundance at a 25 km<sup>2</sup> resolution across the island. Models' predictions were  
37 associated to spatial estimate of uncertainty, allowing us to assess the quality of the model  
38 and the effect that data scarcity has on the certainty of predictions. Furthermore, we validated  
39 the three species-specific models using independent deer hunting returns. Our work clearly  
40 demonstrates the applicability of spatially-explicit ISDMs to empirical data in a Bayesian  
41 context, providing a blueprint for managers to exploit unused and seemingly unusable data  
42 that can, when modelled with the proper tools, serve to inform management and conservation  
43 policies.

## 44 **1 - Introduction**

45           Methods to accurately predict species distributions have been central to wildlife  
46 management, conservation of endangered species, control of invasive species, and  
47 improvement of human-wildlife coexistence (Nyhus 2016, Frans et al. 2021). Species  
48 distribution models (SDMs) correlate species occurrence to variables reflecting climatic and  
49 environmental conditions, allowing us to understand spatiotemporal drivers of species  
50 occurrence in different areas or under different climatic conditions (Guisan and Zimmermann  
51 2000). SDMs have increased in complexity since their origin, aiming to improve the  
52 predictions based on environmental variables, to account for spatial autocorrelation, and to  
53 include different data types, such as presence-only, occurrence, or presence-absence (Guisan  
54 and Thuiller 2005, Elith and Leathwick 2009, Guillera-Aroita et al. 2015).

55           SDMs have been developed to deal with systematically collected data with strict  
56 control for effort, methodology and spatial coverage, although these are typically expensive  
57 to collect and are thus scarce and with low spatial coverage (Hortal and Lobo 2005, Miller et  
58 al. 2019). Unstructured data, where collection effort, protocol, and exact location may not be  
59 specified, offer an alternative, more abundant even though less accurate source of information  
60 with the potential to give relevant insights about species ecology. Unstructured data may  
61 range between museum records and opportunistic citizen science observations, sometimes  
62 collected using recent advances in technology such as smartphone applications (Boyce and  
63 Corrigan 2017, Pacifici et al. 2017); in game species, unstructured data can be originated  
64 from culling returns (Nagy-Reis et al. 2021). Although unstructured datasets may be more  
65 abundant and have wider spatial and temporal coverage than structured data, their use in  
66 SDMs raises issues such as the need to carefully consider observation bias and the  
67 underestimation of local occurrence rates due to the lack of information on the observational  
68 process (Yackulic et al. 2013, Pacifici et al. 2017).

69           Differently from structured data, unstructured and opportunistic datasets do not  
70 include species absences and, to be used in a species distribution model, pseudo-absences  
71 need to be randomly generated in locations where the species could have been present but  
72 were not observed (Lobo et al. 2010). Although different SDM techniques have been  
73 developed to work specifically with one (e.g. presence-absences) or another (e.g. presence-  
74 only) type of data (Elith et al. 2006, Aarts et al. 2012, Isaac et al. 2019), both data types are  
75 often available for a single species, area, and time period, introducing the possibility of  
76 combining them. Two approaches have been developed to cope with this analytical  
77 challenge: data pooling and model-based data integration (or Integrated Species Distribution  
78 Models, ISDMs).

79           The data pooling approach combines datasets prior to entering a model, by degrading  
80 the higher quality dataset until it has a common observation process with the lower quality  
81 dataset (e.g. converting a presence-absence dataset to presence-only observations, Ahmad  
82 Suhaimi et al. 2021). Alternatively, ISDMs avoid losing data quality in the most accurate  
83 dataset by considering the two datasets as different representations of the same distribution,  
84 and thus modelling them together combining the two likelihoods (joint-likelihood approach,  
85 Pacifici et al. 2017). Additional advantages have become obvious in ISDMs: on the one hand,  
86 including an unbiased structured dataset (i.e. a presence-absence dataset) helps compensate  
87 for potential biases in presence-only datasets (Simmonds et al. 2020); on the other hand,  
88 ISDMs improve the ability to predict over a wider geographic area by combining a spatially  
89 restricted presence-absence dataset with an overlapping, but more extensive, presence-only  
90 dataset (Simmonds et al. 2020).

91           As datasets become increasingly complex, the challenge for SDMs is to find  
92 appropriate ways to account for the spatial structure of the observations and their intrinsic  
93 autocorrelation. Hierarchical Bayesian models allow for the inclusion of a spatially structured

94 random effect (i.e. spatial field) that captures all the spatially explicit structures that might  
95 influence the distribution of observations (Paradinas et al. 2017, Lezama-Ochoa et al. 2020).  
96 In addition, Integrated Nested Laplace Approximation (INLA) methods have recently been  
97 implemented within the *R-INLA* package (Rue et al. 2009, Bakka et al. 2018) and the more  
98 recent development of the *inlabru* package (which provides easy access to most *R-INLA*  
99 functionality for spatially structured data, Bachl et al. 2019). INLA provides a  
100 computationally fast modelling environment for hierarchical Bayesian models where  
101 complex spatially structured random effects can be added to models for a wide variety of  
102 response variables (e.g. binomial models for presence-absence data or Poisson models for  
103 presence-only and count data, Bakka et al. 2018).

104         The above mentioned methods can help to model species distributions and understand  
105 their drivers, turning them into a great tool for wildlife conservation and management  
106 (Linnell and Zachos 2011). Since the latter half of the 20<sup>th</sup> century, ungulate populations  
107 across Europe have shown similar expansive trends and increased local densities (Apollonio  
108 et al. 2010, Putman et al. 2011), placing them at the heart of human-wildlife coexistence  
109 research. Human-ungulate coexistence has permeated a wide variety of land-uses, among  
110 them the damage to commercial forestry plantations (Chadwick et al. 1996, Spake et al.  
111 2020) and crops (Linnell et al. 2020); the transmission of diseases to livestock and eventually  
112 humans (Gortázar et al. 2012); and collisions with vehicles (Langbein et al. 2011). Most  
113 management plans depend on regulating the populations through hunting quotas, which  
114 requires a good assessment of population densities, locally and globally (Putman et al. 2011,  
115 Krausman and Bleich 2013, Richardson et al. 2020). However, despite the importance of  
116 having accurate estimates of population densities and distributions to inform management,  
117 survey methods are rarely coordinated or standardised, and most information comes from

118 private stakeholders' efforts to survey local populations (Liu and Nieuwenhuis 2014) or, at  
119 most, population estimates based on hunting returns (Apollonio et al. 2010).

120 Ireland provides a representative study case to apply recent advances with ISDMs to  
121 ungulate management, being home to expanding populations of native red deer (*Cervus*  
122 *elaphus*), and non-native fallow (*Dama dama*) and sika deer (*Cervus nippon*, Carden et al.  
123 2011). Despite the recent population expansion of the three species (Purser et al. 2010, Liu  
124 and Nieuwenhuis 2018), Ireland lacks a national management plan for any of its deer species  
125 and, currently, management is limited to hunting permits that do not limit hunters on where  
126 (e.g. high-density hotspots), how many, and which deer (e.g. species, age and sex classes) to  
127 hunt. This is due to the lack of an empirical basis on deer distribution and relative abundance  
128 needed to set harvest quotas, maintain healthy populations and improve human-wildlife  
129 coexistence (Millspaugh et al. 2009, Williams 2011, Nagy-Reis et al. 2021). Up until now  
130 ISDMs within an INLA context had only been applied to simulated data (Simmonds et al.  
131 2020, Ahmad Suhaimi et al. 2021); here, for the first time, we demonstrate how this approach  
132 can be applied to empirical data.

133 Specifically, we collated all data available on deer distribution in Ireland previously  
134 collected by several stakeholders at different spatio-temporal scales. We also collected  
135 original data using *ad hoc* web tools we created and made accessible to deer stakeholders.  
136 Our goal is to demonstrate how ISDMs can integrate structured and unstructured data to  
137 produce and validate predicted distributions for each species of deer present in Ireland,  
138 fundamental to inform science-based management practices. This study aims at  
139 demonstrating the applicability of an approach that can be adapted more broadly, and  
140 ultimately produce more accurate distributions of species that can be used for science-  
141 informed wildlife conservation and for the management of human-wildlife conflicts.

## 142 **2 – Methods**

### 143 2.1 Studied species

144           There are three species of deer well distributed through Ireland, red deer, sika deer,  
145 and fallow deer. Red deer are native to Ireland (but see Carden et al. 2012), whereas fallow  
146 deer were introduced by the Anglo-Normans in the 12th century (Beglane et al. 2018) and  
147 sika deer were initially introduced for ornamental purposes in 1860s in the Wicklow  
148 mountains not far from Dublin (Powerscourt 1884).

149           To gather all data available on deer in Ireland and Northern Ireland (NI, UK), we  
150 contacted (1) Coillte (<https://www.coillte.ie/>), which provided the results of the systematic  
151 deer presence-absence surveys in part of the 440,000 ha of forests they manage in Ireland,  
152 and (2) the British Deer Society (<https://bds.org.uk/>), which provided survey data on the  
153 presence-absence of deer in NI. These first two datasets were the only presence-absence (PA)  
154 data available for the entire island. We collated presence-only (PO) data from (1) the British  
155 Agri-Food and Biosciences Institute (<https://www.afbini.gov.uk/>) which provided geotagged  
156 data on culling returns from NI. We also downloaded all observations from (2) Ireland's  
157 National Biodiversity Database (<https://biodiversityireland.ie/>), a citizen science platform  
158 where users can submit deer observations, (3) iNaturalist (<https://www.inaturalist.org/>), an  
159 international platform with the same goal; (4) and the platform CEDaR  
160 ([https://www.nmni.com/CEDaR/CEDaR-Centre-for-Environmental-Data-and-](https://www.nmni.com/CEDaR/CEDaR-Centre-for-Environmental-Data-and-Recording.aspx)  
161 [Recording.aspx](https://www.nmni.com/CEDaR/CEDaR-Centre-for-Environmental-Data-and-Recording.aspx)) which curates all data for NI obtained from citizen science platforms and  
162 other surveys; and (5) the web survey (<https://smartdeer.ie/>) we developed *ad hoc* to collect  
163 PO data from Irish deer stakeholders

164           We obtained a total of 29,140 PA observations and 4,185 PO observations, spanning  
165 between 2007 and 2022 (the vast majority being collected in the last decade, see Table 1 for

166 full details on the temporal resolution of data). From these, we generated three separate  
167 datasets, one for each species (red, sika, and fallow deer), to run one model for each. In  
168 addition to the PO and PA data introduced above, we gathered hunting culling returns from  
169 the National Park & Wildlife Service (NPWS, <https://www.npws.ie/>), responsible for issuing  
170 hunting licences. Culling returns are an alternative source of data (Milner et al. 2006, Forsyth  
171 et al. 2022), and we retained this dataset to validate the ISDMs we built by integrating PO  
172 and PA data.

## 173 2.2 Data collection and pre-processing

### 174 *2.2.1 Presence absence (PA) data*

175 PA data for each species were obtained from Coillte based on surveys performed in a  
176 fraction of the 6,000 properties they manage (Table 1), by asking property managers (who  
177 visit the forests they manage on a regular basis) whether deer were present and, if so, what  
178 species. Properties range in size from less than one to around 2,900 ha, and to assign the PA  
179 value to a specific location, we calculated the centroid of each property using the function  
180 *st\_centroid()* from the package *sf* in R (Pebesma 2018). The survey was mainly performed in  
181 2010 and 2013, in addition to further data collected between 2014 and 2016. Some properties  
182 were surveyed only once in the period 2010-2016, but for those that were surveyed more than  
183 once, the value for that location was considered “absence” if deer had never been detected in  
184 the property in any of the surveys, and “presence” in all other cases. In addition to these  
185 surveys, Coillte commissioned density surveys based on faecal pellet sampling in a subset of  
186 their properties between the years 2007 and 2020. Any non-zero densities in these data were  
187 considered “presences”, and all zeros were considered “absences”. These data were also  
188 summarised across years when a property had been repeatedly sampled, and counted as  
189 presence if deer had been detected in any of the samples (Table 1).



190 PA data for NI were obtained from a survey carried out by the British Deer Society in  
191 2016. The survey divided the British territory in 100 km<sup>2</sup> grid cells and deer presence was  
192 assigned based on public contributions, which were then reviewed and collated by experts.  
193 Since 100 km<sup>2</sup> grid cells are quite large, we did not, as with the Coillte properties, calculate  
194 the centroid of each cell and assign the PA value of the cell to it. Instead, we randomly  
195 simulated positions within each cell and assigned the presence or absence value of the cell to  
196 each of them. We performed a sensitivity analysis to calculate an optimal number of positions  
197 that would capture the environmental variability within each cell (Suppl material S1), which  
198 was set to 5 random positions per grid cell. After processing, we obtained a total of 920 PA  
199 data across NI (Fig 1a).

#### 200 *2.2.2 Presence only (PO) data*

201 PO data were collected from various sources, mainly (but not only) from citizen  
202 science initiatives. The National Biodiversity Data Centre (NBDC) is an Irish initiative that  
203 collates biodiversity data coming from different sources, from published studies to citizen  
204 contributions. From them, we obtained all contributions on the three species, a total of 1,430  
205 records. To this, we added the 164 records of deer in Ireland downloaded from the iNaturalist  
206 site, another citizen contributed database that collects the same type of data. From the  
207 resulting dataset, we (1) removed all observations with a spatial resolution lower than 1 km<sup>2</sup>;  
208 (2) did a visual inspection of the data and comments, and removed all observations that were  
209 obviously incorrect (i.e. at sea or that the comment specified it was a different species); (3)  
210 filtered out all the fallow deer reported in Dublin's enclosed city park (Phoenix Park) to avoid  
211 biases caused by the large amount of people reporting deer from the capital; and (4) filtered  
212 duplicate observations by retaining only one observation per user, location, and day. The  
213 Centre for Environmental Data and Recording (CEDaR) plays a similar role to the NBDC in  
214 Northern Ireland. They provided 872 records of deer in NI, coming from different survey,

215 scientific, and citizen science initiatives, from which we removed all records provided with a  
 216 spatial resolution lower than 1 km<sup>2</sup>. The location and species of 469 deer culled between  
 217 2019 and 2021 in NI were obtained from the British Agri-Food and Biosciences Institute. For  
 218 the observations that did not have specific coordinates, we derived them from the location  
 219 name or postcode if provided.

220 As part of a nationally funded initiative to improve deer monitoring in Ireland  
 221 (SMARTDEER), we developed a bespoke online tool to facilitate the reporting of deer  
 222 observations by the general public and all relevant stakeholders e.g. hunters, farmers, or  
 223 foresters. Observations were reported in 2021 and 2022 by clicking on a map to indicate a 1  
 224 km<sup>2</sup> area where deer have been observed. For each user and session, we calculated the area of  
 225 the surface covered in squares, and simulated a number of positions proportional to the size  
 226 of the polygon and distributed them within it to generate a number of exact positions  
 227 equivalent to the area were the user had indicated an observation (details in Supp material  
 228 S1). In total, the SMARTDEER tool allowed us to collect 4,078 presences across Ireland and  
 229 NI (Table 1, Fig. 1b).

| <b>Table 1.</b> Summary of the presence-absence (PA, structured data) and presence-only (PO, unstructured data) datasets gathered for Ireland and Northern-Ireland (NI, UK). |                         |             |              |              |              |
|------------------------------------------------------------------------------------------------------------------------------------------------------------------------------|-------------------------|-------------|--------------|--------------|--------------|
| Data type                                                                                                                                                                    | Source                  | Years       | Red deer     | Sika deer    | Fallow deer  |
| PA                                                                                                                                                                           | BDS survey              | 2016        | 920          | 920          | 920          |
|                                                                                                                                                                              | Coillte density surveys | 2007 - 2020 | 417          | 417          | 417          |
|                                                                                                                                                                              | Coillte desk surveys    | 2010 - 2016 | 4 936        | 4 936        | 4 936        |
|                                                                                                                                                                              | <b>TOTAL</b>            |             | <b>6 273</b> | <b>6 273</b> | <b>6 273</b> |
| PO                                                                                                                                                                           | Citizen Science         | 2005 - 2021 | 408          | 573          | 394          |
|                                                                                                                                                                              | AFBI culling returns    | 2017 - 2021 | 7            | 169          | 259          |
|                                                                                                                                                                              | Smartdeer web survey    | 2021 - 2022 | 507          | 460          | 528          |
|                                                                                                                                                                              | Others                  | 2001 - 2018 | 51           | 35           | 69           |
|                                                                                                                                                                              | <b>TOTAL</b>            |             | <b>973</b>   | <b>1 237</b> | <b>1 250</b> |

230

231

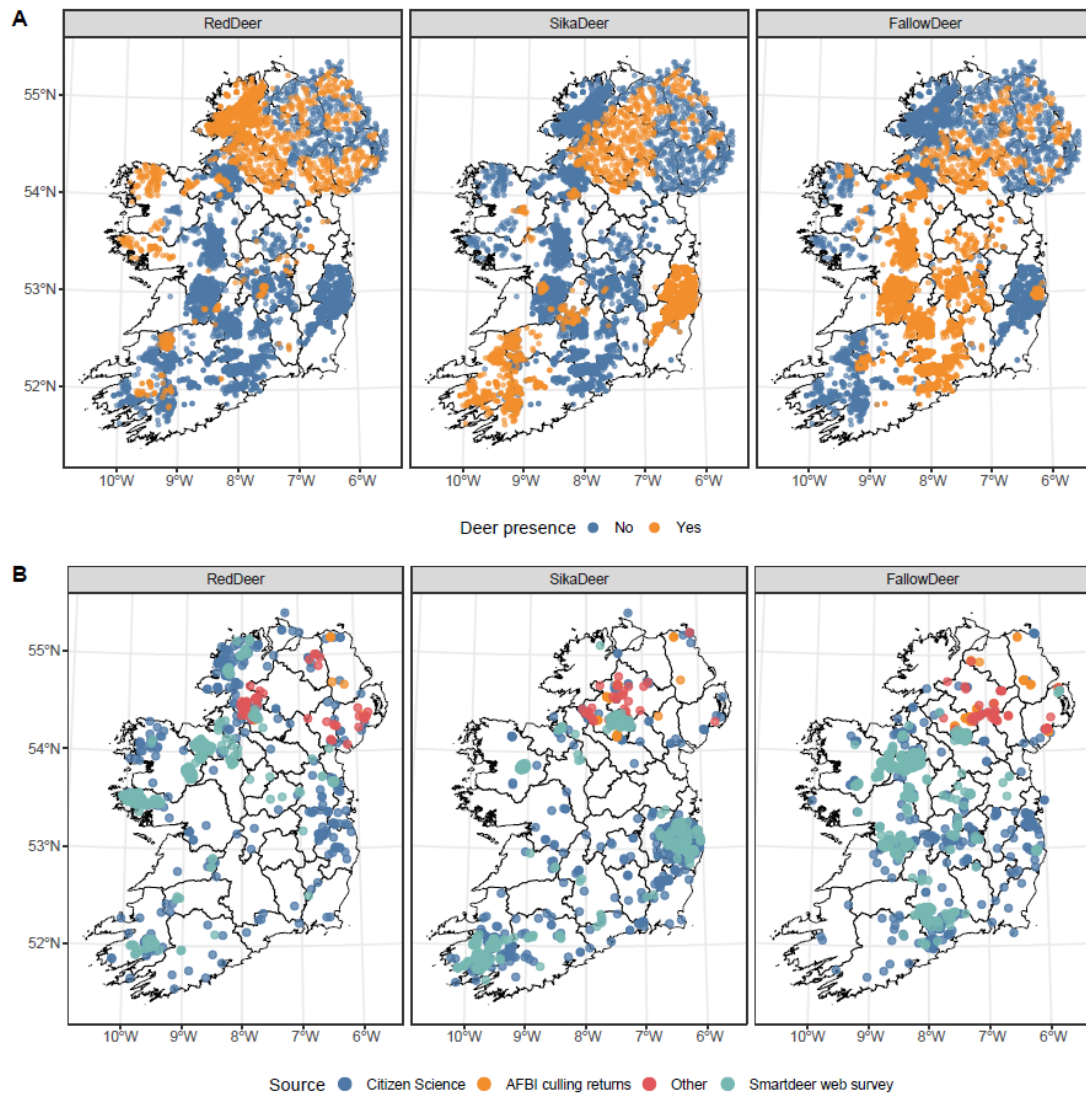

**Figure 1:** presence-absence (A) and presence-only (B) data for each deer species (see Table 1 for sample sizes and temporal resolution). Presence-absence data were provided by Coillte in Ireland and by the British Deer Society in Northern Ireland (NI, UK), while presence-only data were collated from a wide variety of sources including citizen science data, location of culled animals, and our own web tools specifically designed for deer stakeholders (<https://smartdeer.ie/>).

232           The data used in the models were collected between 2007 and 2022. Deer populations  
233 expanded in Ireland until 2008 (Carden et al. 2011), and according to culling return data have  
234 somewhat stabilised since then (NPWS official data). Although the range expansion of deer  
235 species would merit further investigation, here we provide for the first time an accurate  
236 modelled distribution of the three main species of deer in Ireland, and since the data are  
237 scarce, we have made use of all available data without considering the temporal trends. A

238 continued data collection scheme will provide enough data to study population size and range  
239 changes, but this is beyond the scope of this manuscript.

### 240 2.3 Statistical model

241 To integrate the two datasets into one model for each species, we used functions from  
242 the *PointedSDMs* package (<https://github.com/PhilipMostert/PointedSDMs>). This package is  
243 designed to construct ISDMs from different data sources by employing the functions from the  
244 *inlabru* package (Bachl et al. 2019), within the R-INLA framework (Rue et al. 2009).  
245 Through the functions provided in the package, we constructed a joint likelihood model, with  
246 the PA data modelled as a Bernouilli distribution (Isaac et al. 2019), modelling the  
247 probability of observing an individual at each location  $s$

$$248 \quad Y_s \sim \text{Bernouilli}(p_s)$$

$$249 \quad \text{cloglog}(p_s) = \alpha_1 + \beta_1 x_1 + \dots + \beta_n x_n + \xi_s$$

250 where  $Y_s$  is the binary response variable (PA) and  $p_s$  is the probability of presence. This is  
251 linked to the linear predictor by a complementary log-log link function (cloglog, Ahmad  
252 Suhaimi et al. 2021). The linear predictor is composed of a dataset-specific intercept ( $\alpha_1$ ), a  
253 set of covariates ( $x_1$  to  $x_n$ ) and their coefficients ( $\beta_1$  to  $\beta_n$ ), and a dataset-specific random  
254 spatial effect (spatial field) to account for the spatial structure of the data ( $\xi_s$ ).

255 In turn, the PO data are modelled as a log-Gaussian Cox process with intensity  
256 function

$$257 \quad N(A) \sim \text{Poisson} \int_A \lambda(s) d(s)$$

$$258 \quad \log(\lambda(s)) = \alpha_2 + \beta_1 x_1 + \dots + \beta_n x_n + \omega_s$$

259 where  $N$  is the expected number of presences in the study area ( $A$ ),  $\lambda$  is the intensity function,  
260  $\alpha_2$  is the dataset-specific intercept, the same vector of covariates with their effect sizes as in

261 the PA model, and another data-specific spatial field ( $\omega_s$ ). The use of the cloglog link in the  
262 binomial model allows its response to be interpreted on the same scale as the response of the  
263 Poisson model, which allows the sharing of parameters between likelihoods (Bowler et al.  
264 2019). Spatial fields from both processes (PO, PA) are modelled as Gaussian random fields  
265 with Matérn covariance functions, which are approximated using a triangulation of the study  
266 area (called a mesh) through stochastic partial differential equations fitted in a Bayesian  
267 context through integrated nested Laplace approximations (Lindgren et al. 2011).

### 268 *2.3.1 Prior specification*

269 The spatial fields are controlled by two hyperparameters –range and marginal variance.  
270 The range controls the smoothness of the spatial field (i.e. the distance between peaks and  
271 throughs), and the variance controls the magnitude of these peaks and throughs. In the  
272 Bayesian context in which we are fitting this model, we need to set prior values to these two  
273 hyperparameters. To do so, we use Penalised Complexity (PC) priors, a newly developed  
274 framework that allows easily interpretable and controllable priors (Simpson et al. 2014). PC  
275 priors are weakly informative (allowing the posterior of each hyperparameter to be mainly  
276 controlled by the data) and penalise model complexity by “pulling” the model towards its  
277 simplest realisation (the “base” model), which has infinite range and zero variance (i.e. a  
278 completely flat spatial field, absence of spatial structure). To set the priors, we inform the  
279 model of “how far it is allowed to deviate” from those base models using the following  
280 specifications:

- 281 - The prior on the range ( $\rho$ ) is set providing the lower tail quantile  $\rho_0$  and the  
282 probability  $P(\rho)$  so that

$$283 \text{Prob}(\rho < \rho_0) = P(\rho)$$

284 or “the probability that the true range ( $\rho$ ) is smaller than  $\rho_0$  is  $P(\rho)$ ”. For example, if we set  
285  $\rho_0$  to be 50 and  $P(\rho)$  to be 0.05, we are telling the model that the probability of the true range  
286 of the spatial field being smaller than 50 km is 5%. In this way we are limiting the range to  
287 values between infinite (the base model) and 50, i.e. we are saying that the smallest that the  
288 range could possibly be is 50 km with a probability of 95%.

289 - The prior on the variance is set on the standard deviation, providing the upper tail  
290 quantile  $\sigma_0$  and the probability  $P(\sigma)$  so that

$$291 \quad \text{Prob}(\sigma > \sigma_0) = P(\sigma)$$

292 or “the probability that the true standard deviation  $\sigma$  is larger than  $\sigma_0$  is  $P(\sigma)$ ”. For example,  
293 if we set  $\sigma_0$  to be 0.5 and  $P(\sigma)$  to be 0.05, the probability of the true standard deviation being  
294 larger than 0.5 is 5%, so effectively the standard deviation value is limited between 0 (the  
295 base model) and 0.5 with a 95% probability.

296 Priors have to be carefully specified, but there is no absolute rule for it, so the  
297 decisions that go into the prior choice are an essential part of the modelling process. In this  
298 case, we started off with a prior for the range (for both the PO and PA spatial fields, and for  
299 the three species) that was equal to the size of the triangles of the mesh (40 km). In this way,  
300 we are providing the minimum amount of information to the model, as we are setting the  
301 lower limit for the range as the limit of the resolution of the model. For the standard  
302 deviation, we started with a prior of 1 for all spatial fields, a value large enough to serve as an  
303 appropriate upper limit.

### 304 *2.3.2 Covariate selection*

305 Raster environmental covariates used in the models were obtained from the  
306 Copernicus Land Monitoring Service (© European Union, Copernicus Land Monitoring  
307 Service 2018, European Environment Agency (EEA)), whereas the vector layers (roads,

308 paths) were obtained from the Open Street Map service (OpenStreetMap contributors, 2017.  
309 Planet dump [Data file from January 2022]. <https://planet.openstreetmap.org>). Vector layers  
310 were transformed into distance layers (distance to roads, distance to paths) using the  
311 *distance()* function from the package *raster*, and into density layers (density of roads, paths)  
312 using the *rasterize()* function of the same package (Hijmans 2021). All raster layers were  
313 resampled to the lowest resolution available in the used covariates, resulting in a 1 km<sup>2</sup>  
314 resolution. A full description of the process of covariate selection (including screening for  
315 collinearity) can be found in the supplementary material (Supp mat. S1). The covariates  
316 eventually used in the model were elevation (m), slope (degrees), tree cover (%), small  
317 woody feature density (%), distances to forest edge (m, positive distances indicate a location  
318 outside a forest, negative distances indicate a location within a forest), and human footprint  
319 index (Venter et al. 2016, 2018). All covariates were scaled by subtracting the mean and  
320 dividing by the standard deviation before entering the model (function *scale()* from the *raster*  
321 package).

### 322 2.3.3 Spatial predictions

323 From the fitted models, we used the *predict()* function from the *inlabru* package to  
324 obtain predicted deer densities in a 25 km<sup>2</sup> grid. Since models were fitted in a Bayesian  
325 context, the prediction obtained at each location is not a point value but a distribution, from  
326 which we can produce the mean and the standard deviation, thus obtaining a spatial estimate  
327 of the uncertainty of the prediction. We used the same function to obtain the prediction of the  
328 spatial effects, which can provide an indication of the spatial autocorrelation structure of each  
329 of the datasets. The model is designed on the assumption that not all individuals have been  
330 observed and although in theory the total abundance can be predicted integrating the intensity  
331 of the process over all the study area, an imperfect detection will affect the predicted total  
332 abundance. In all our models the total predicted abundances were grossly underestimated, so

333 we decided to use the predictions in the linear scale and, rescaled from 0 to 1, use them as  
334 relative abundances instead of total abundances or densities.

#### 335 2.4 Model validation

336 To validate the results of our models, we obtained culling return data from the NPWS,  
337 aggregated by county between 2008 and 2018. The data consist of the number of harvested  
338 deer of each species by county (ranging from 826 to 7,500 km<sup>2</sup>) and year, and the number of  
339 hunting licences issued. To consider the increase in hunting pressure affecting the number of  
340 deer harvested, we corrected each year and species data by the number of licences issued, and  
341 then aggregated the data of the past 10 years by calculating the mean. Thus, we obtained  
342 average deer harvested (corrected by number of licences) for each county. From our ISDMs,  
343 we obtained the predictions this time in the response scale, to obtain aggregated abundances  
344 by county, and then used a linear model to investigate how well our models predicted county-  
345 level culling returns, using the R<sup>2</sup> score to evaluate the performance of the models.

### 346 **3 – Results**

347 We developed one model for each species, including effects for six covariates (tree  
348 cover, density of small woody features, distance to the forest edge, slope, elevation, and  
349 human footprint index), and two spatial fields, one for the PO data and one for the PA data  
350 (Fig. S6). For red and sika deer the priors specified above for the spatial fields provided good  
351 enough posterior estimates, and we did not modify them to allow the data distribution to  
352 inform the model output. For fallow deer, a standard deviation of one proved insufficient to  
353 capture the variability of the PO spatial field, so we ran the model again with a prior value of  
354 two (Table 2).

355



**Table 2.** Priors' specification and posterior distribution estimated for the spatial fields in the three species-specific models (red, sika, fallow deer) for both presence-absence (PA) and present-only (PO) data. Spatial fields are defined in our model by their range and standard deviation (St. dev). Priors are set on these parameters as point values, and posterior distributions are obtained which we have summarised here as "mean (standard deviation)".

|             |                  | PA data      |           | PO data      |            |
|-------------|------------------|--------------|-----------|--------------|------------|
| Species     |                  | Range        | St. dev   | Range        | St. dev.   |
| Red deer    | Prior            | 40           | 1         | 40           | 1          |
|             | Posterior distr. | 269.1 (80.0) | 0.6 (0.1) | 206.5 (21.5) | 1.3 (0.1)  |
| Sika deer   | Prior            | 40           | 1         | 40           | 1          |
|             | Posterior distr. | 266.5 (70.6) | 0.6 (0.1) | 207.4 (33.4) | 1.5 (0.1)  |
| Fallow deer | Prior            | 40           | 1         | 40           | 2          |
|             | Posterior distr. | 193.8 (47.7) | 0.7 (0.1) | 171.5 (26.8) | 1.46 (0.1) |

356           The posterior range and SD of the spatial fields showed larger ranges and smaller SD  
357 for the PA data than for the PO data, reflecting the differences in spatial structure of each  
358 dataset. PA data points are more evenly distributed throughout, while PO data points display  
359 more clustering.

360           The covariate effects for the three models (Fig. 2) showed that the three species had,  
361 in general, similar ecology in terms of environmental preferences, i.e. sika, red, and fallow  
362 deer were more likely to be observed within forests (negative values of distance to forest  
363 edge) with high tree cover densities. Elevation had a small but significantly negative effect on  
364 the distribution of the three species, and while slope did not have a clear effect in red and  
365 fallow deer distribution (CIs overlap zero), sika deer seemed to prefer areas with steeper  
366 slopes. The three species distributions seemed to match areas with greater human footprint, in  
367 line with the expectation that bare and unpopulated lands are less attractive to deer.

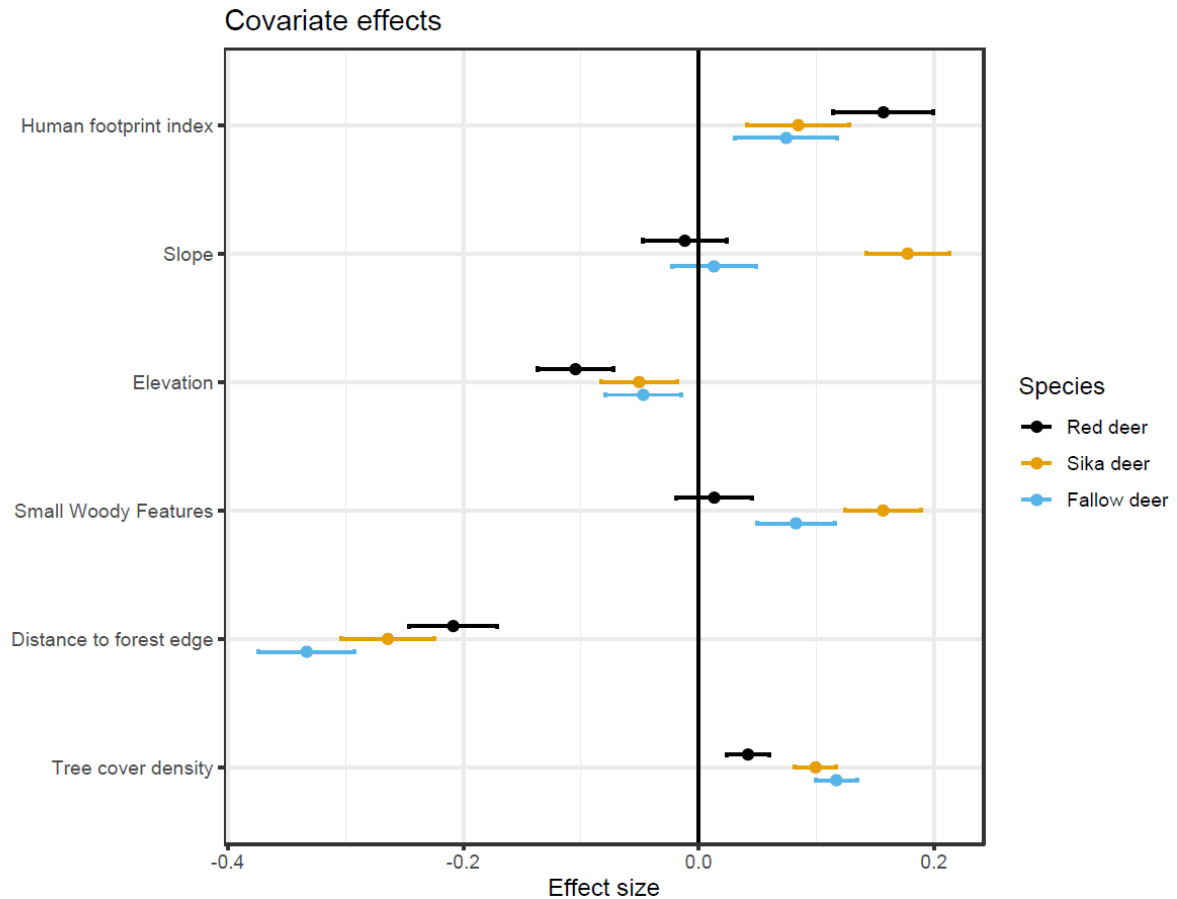

**Figure 2.** Covariate effects for each of the models for red (top, black), sika (middle, orange) and fallow (bottom, blue) deer. Circles represent the median value of the effect, while the bars represent the 95% credible intervals (CIs).

368 From each of the models we obtained a spatial prediction that allowed us to plot a  
369 mean prediction and its standard deviation (Fig. 3). Red deer hotspots were detected in the  
370 NW and SW of Ireland. Sika deer were present at higher relative abundances in a hotspot at  
371 the east coast, and more diffusely in the SW, overlapping with a red deer hotspot. Lastly,  
372 fallow deer are mainly distributed in the midlands. For all species, the standard deviation was  
373 larger in NI, reflecting the scarcity of PO data in that region.

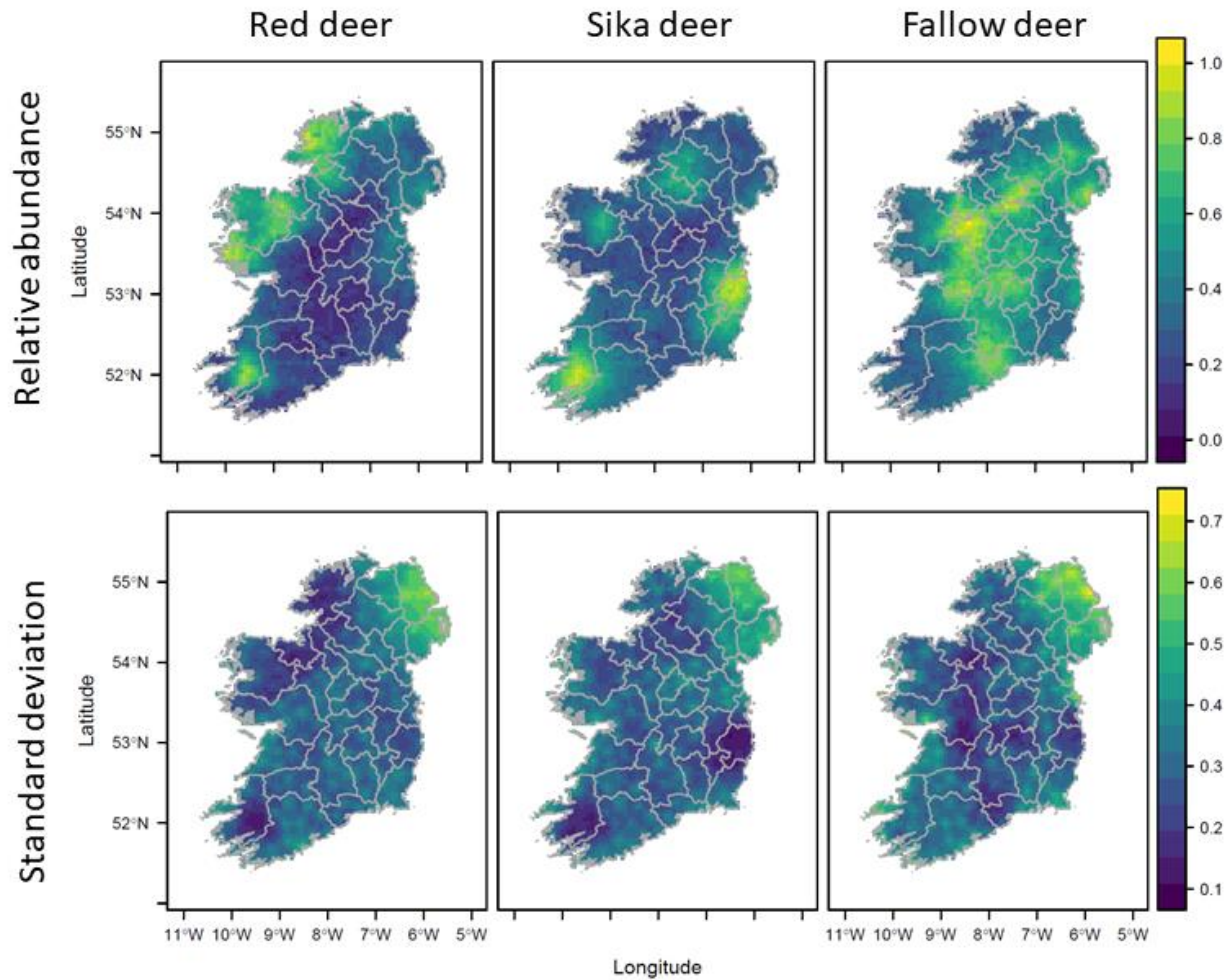

**Figure 3.** Mean (top) and standard deviation (bottom) of the spatial predictions for red, sika and fallow deer. The values indicate relative abundances, with 0 reflecting absence of the species and values closer to 1 representing the areas where the species is more abundant.

374 For the three models, ranges were larger and marginal variances smaller for the spatial  
375 fields of the PA datasets (Table 2, Fig. S1) than for those of the PO datasets, reflecting the  
376 more regular structure and thus lesser spatial autocorrelation of the dataset.

377 Our ISDMs predicted distribution and relative abundance across Ireland, and, when  
378 aggregated by county, these predictions were in high agreement with the independent dataset  
379 of culling returns corrected by hunters' licences. The validation analysis showed that our  
380 models were particularly good in predicting distribution and relative abundance for sika deer  
381 ( $R^2 = 0.69$ ), followed by red ( $R^2 = 0.52$ ) and fallow deer ( $R^2 = 0.44$ ).

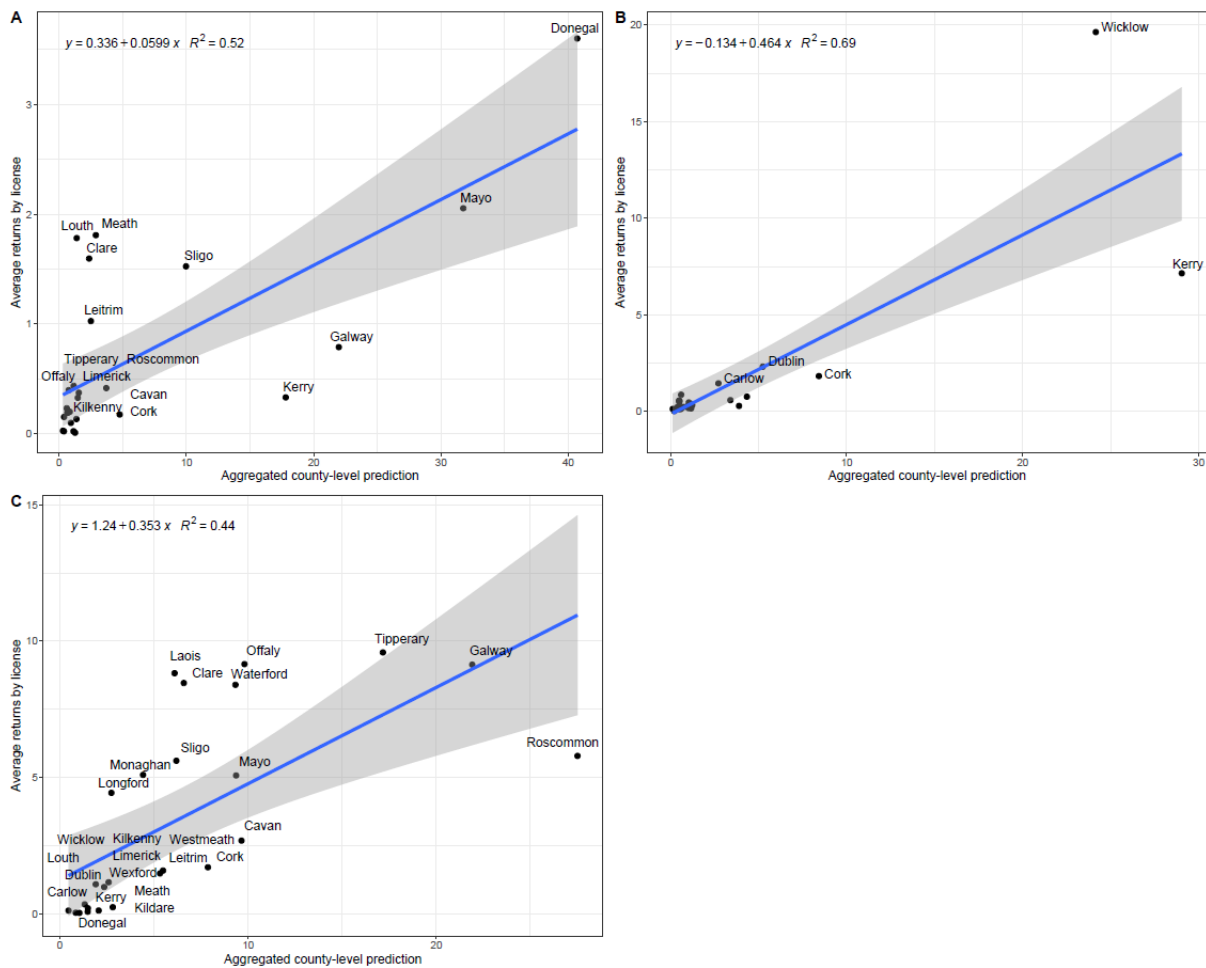

**Figure 4** Validation plots for the ISDMs predicting red (A), sika (B) and fallow deer (C) distribution and relative abundance. Predictions of the ISDMs (x-axis, aggregated county-level abundance) are regressed against average culling returns (corrected by hunter licences at the county level, y-axis)

382

## 383 4 – Discussion

### 384 4.1 Applicability of joint likelihood models in an INLA context to real data

385 Our results demonstrated the practical applications of ISDM in the INLA Bayesian  
386 context for the first time with real data, a method that so far had only been applied to  
387 simulated datasets (Simmonds et al. 2020, Ahmad Suhaimi et al. 2021). Despite the scarcity  
388 and low quality of the data, our models managed to successfully produce not only a  
389 prediction of the distribution for each species, but also to map the uncertainty. The predicted  
390 distributions displayed small standard deviations across most of the island, efficiently

391 reflecting the regions where data are less abundant, demonstrating how fewer data relate to  
392 less certain predictions. Furthermore, we validated the predictions with an external dataset to  
393 ensure their accuracy, finding that our models performed well in predicting county-level  
394 culling returns. Thus, we provide accurate science-based relative abundance maps that  
395 integrate all previous knowledge about deer distribution in Ireland, setting a path for future  
396 data gathering initiatives with conservation and management in sight.

397         The separate spatial random fields for each dataset allowed us to capture the different  
398 observational processes. Although usually PA data come from organised surveys designed to  
399 avoid exhibiting any spatial structure, the PA data in our model might have exhibited some  
400 spatial structure, which would have been absorbed by the PA-specific spatial field. In the  
401 same way, PO data came from many different sources, including citizen science initiatives  
402 that would have a clear observational bias towards more populated areas or those used for  
403 recreation, but also other opportunistic observations that would have a less clearly defined  
404 observational bias. Thus, the use of a PO specific spatial field was more suited for capturing  
405 the spatial structure in that dataset than the addition of a covariate that could represent the  
406 bias, such as the human footprint index or the distance to roads (Dorazio 2014).

#### 407 4.2 Deer distributions and relative abundances in Ireland

408         Our model predicted two main hotspots for red deer. The hotspot in the SW was  
409 centred around the Killarney National Park, a herd under conservation measures such as a  
410 hunting ban in the area (Carden et al. 2012). This ban is reflected in our validation plots,  
411 where our red deer model seemed to predict a larger abundance than what is reflected in the  
412 culling returns, since the culling returns of red deer in that county would be disproportionate  
413 small compared to the reality as much of their range is protected from hunting. The other  
414 hotspots to the NW coincided with areas where modern introductions of red deer have taken

415 place in the past two centuries (Purser et al. 2010), and the diffuse populations along the  
416 eastern coast correspond to the area where the first recorded introduction of red deer into  
417 Ireland took place in 1246 (McDevitt et al. 2009).

418 The sika deer model showed two very clear hotspots in the E and SW of the island,  
419 and two less dense populations in the NW, reflecting the history of their introduction in  
420 Ireland (Purser et al. 2010). There was considerable overlap between the populations of red  
421 and sika deer, which could merit further study on their habitat and diet preferences to  
422 investigate the possible niche, spatial, or temporal segregation that might facilitate  
423 coexistence. From our covariate effects, sika seemed to differ in habitat preferences with red  
424 deer (non-overlapping CIs) in tree cover density and small woody feature density, where sika  
425 deer seemed to prefer denser cover than red deer, and particularly in slope, where sika  
426 seemed to prefer steeper slopes than the other two species. This difference might be reflecting  
427 some habitat or space use partitioning due to competition, but it also might be related to the  
428 fact that sika deer seem to prefer more acidic soils, which would allow them to exploit young  
429 conifer plantations (Alfredsson et al. 1998). In addition, the distribution overlap of the two  
430 species causes concerns with regards to the hybridisation between the two, which has been  
431 observed both in captivity and in the wild (Abernethy 1994) and which could be a threat to  
432 the genetic purity of the Kerry herd (Smith et al. 2014).

433 Fallow deer were predicted to be the most widespread species, distributed mostly over  
434 the areas from where the other two species were largely absent. This might be due to different  
435 habitat and food preferences, since fallow deer are known to be more obligated grazers than  
436 either red or sika deer (Obidziński et al. 2013), or due to competitive exclusion, but it could  
437 also be a reflection of the founder effect since fallow deer seem to have slow range expansion  
438 rates from where their populations are first established (Ward 2005). Nevertheless, since the  
439 last published distribution in 2008 (Carden et al. 2011), fallow deer distribution seems to

440 have expanded northward, now displaying a continuous distribution from the SE coast  
441 through the midlands and the west and all the way up to the NW coast.

#### 442 4.3 Joint likelihood models as a tool for management in data-scarce scenarios

443 Our predicted distributions described an island where deer of at least one species were  
444 omnipresent, with some regions where two species spatially overlap. The covariates showed  
445 that although the three species preferred areas with dense tree cover and within forests or  
446 small woody features, that did not necessarily mean that deer shy away from human presence,  
447 reflected in our models by a positive effect of human footprint index. That is, however, more  
448 reflective of Ireland's natural habitats than of deer preferences: Ireland and NI have a large  
449 proportion of heavily modified habitat (approximately 69% of Ireland and 76% of NI are  
450 covered by farmland, (2021b, 2021a), with most of their agricultural land devoted to  
451 permanent and rough grazing grasslands, very attractive to deer (Drennan et al. 2005, O'Mara  
452 2012), The forests, small and patchily distributed, are mostly non-native and are present  
453 within mosaics dominated by human modified habitats, making it almost impossible for deer  
454 to avoid anthropomorphised environments. This has obvious consequences for human-  
455 wildlife coexistence, since deer have more opportunities to interact heavily with human  
456 resources such as roads, commercial forestry and farms. Thus, these results constitute a  
457 starting point for management, by providing information on areas where the relative densities  
458 of the relevant deer species are higher, and where targeted actions would be most effective.

459 With this research, we have demonstrated the use of joint Bayesian spatial models  
460 fitted through INLA methods to obtain accurate distributions and relative abundances of  
461 species. Our models have been validated with independent data, proving their accuracy even  
462 with low quality, patchy data, which makes them a useful tool for the management and  
463 conservation of wildlife in most contexts where a data collection protocol has not been

464 established. Our work now opens new exciting future scenarios, because the same type of  
465 model can be adapted to estimate actual abundances by including data on the number of  
466 individuals (e.g. group sizes) and sampling effort, leading ISDMs to produce even more  
467 accurate information on species abundances which are so essential for science-informed  
468 management.

## 469 **5 – Acknowledgements**

470 We are thankful to all the agencies that provided data (complete list in methods  
471 section), and to the people that facilitated the datasets and were available to answer enquiries.  
472 Additional thanks to Sarah Keenan and Charles Harper for their contribution to the  
473 SMARTDEER project, and to Andrew McCullagh and Tony Quinn (DAFM) for their  
474 continued support throughout the development of the project.

## 475 **6 – Funding statement**

476 This work is a part of a nationally-coordinated project entitled "A smart and open-  
477 science approach to monitor and analyse deer populations in the Republic of Ireland and set  
478 the scene for evidence-based deer management" funded by DAFM, grant 2019R417 [2019  
479 Research Call Instruments (II - V)]. VM-P was additionally funded by the Department of  
480 Further and Higher Education, Research, Innovation and Science of the government of  
481 Ireland, through the Higher Education Authority's call to support research disrupted by  
482 COVID-19.

## 483 **7 – Author contributions:**

484 VM-P: conceptualization, data curation, methodology, formal analysis, validation,  
485 visualization, writing - original draft, writing - review & editing; PSM: software, writing -  
486 review & editing; KM: conceptualization, data curation, writing - review & editing; TB: data  
487 curation, writing - review & editing; BC: data curation, writing - review & editing; BJM:



488 conceptualization, project administration, writing - review & editing; MN: conceptualization,  
489 project administration, writing - review & editing; KM: software, writing - review & editing;  
490 AW: data curation, writing - review & editing; SC: conceptualization, data curation,  
491 supervision, funding acquisition, project administration, writing - review and editing.

## 492 **References**

- 493 Aarts, G., J. Fieberg, and J. Matthiopoulos. 2012. Comparative interpretation of count,  
494 presence-absence and point methods for species distribution models. *Methods in*  
495 *Ecology and Evolution* **3**:177-187.
- 496 Abernethy, K. 1994. The establishment of a hybrid zone between red and sika deer (genus  
497 *Cervus*). *Molecular Ecology* **3**:551-562.
- 498 Ahmad Suhaimi, S. S., G. S. Blair, S. G. Jarvis, and B. Leroy. 2021. Integrated species  
499 distribution models: A comparison of approaches under different data quality  
500 scenarios. *Diversity and Distributions* **27**:1066-1075.
- 501 Alfredsson, H., L. M. Condrón, M. Clarholm, and M. R. Davis. 1998. Changes in soil acidity  
502 and organic matter following the establishment of conifers on former grassland in  
503 New Zealand. *Forest Ecology and Management* **112**:245-252.
- 504 Apollonio, M., R. Andersen, and R. J. Putman. 2010. European ungulates and their  
505 management in the 21st century. Cambridge University Press.
- 506 Bachl, F. E., F. Lindgren, D. L. Borchers, and J. B. Illian. 2019. inlabru: an R package for  
507 Bayesian spatial modelling from ecological survey data. *Methods in Ecology and*  
508 *Evolution* **10**:760-766.

- 509 Bakka, H., H. Rue, G. A. Fuglstad, A. Riebler, D. Bolin, J. B. Illian, E. Krainski, D. P.  
510 Simpson, and F. K. Lindgren. 2018. Spatial modeling with R-INLA: A review. Wiley  
511 Interdisciplinary Reviews: Computational Statistics:1-24.
- 512 Beglane, F., K. Baker, R. F. Carden, A. R. Hoelzel, A. L. Lamb, R. M. Fhionnhaile, H.  
513 Miller, and N. Sykes. 2018. Ireland's fallow deer: their historical, archaeological and  
514 biomolecular records. *Proceedings of the Royal Irish Academy: Archaeology,  
515 Culture, History, Literature* **118C**:141-165.
- 516 Bowler, D. E., E. B. Nilsen, R. Bischof, R. B. O'Hara, T. T. Yu, T. Oo, M. Aung, and J. D. C.  
517 Linnell. 2019. Integrating data from different survey types for population monitoring  
518 of an endangered species: the case of the Eld's deer. *Scientific Reports* **9**:7766.
- 519 Boyce, M. S., and R. Corrigan. 2017. Moose Survey App for Population Monitoring. *Wildlife  
520 Society Bulletin (2011-)* **41**:125-128.
- 521 Carden, R. F., C. M. Carlin, F. Marnell, D. McElholm, J. Hetherington, and M. P. Gammell.  
522 2011. Distribution and range expansion of deer in Ireland. *Mammal Review* **41**:313-  
523 325.
- 524 Carden, R. F., A. D. McDevitt, F. E. Zachos, P. C. Woodman, P. O'Toole, H. Rose, N. T.  
525 Monaghan, M. G. Campana, D. G. Bradley, and C. J. Edwards. 2012.  
526 Phylogeographic, ancient DNA, fossil and morphometric analyses reveal ancient and  
527 modern introductions of a large mammal: the complex case of red deer (*Cervus*  
528 *elaphus*) in Ireland. *Quaternary Science Reviews* **42**:74-84.
- 529 Central Statistics Office. 2021. Environmental Indicators Ireland 2021. Retrieved from  
530 <https://www.cso.ie>

- 531 Chadwick, A. H., P. R. Ratcliffe, and K. Abernethy. 1996. Sika deer in Scotland: density,  
532 population size, habitat use and fertility - some comparisons with red deer. *Scottish*  
533 *Forestry* **50**:8-16.
- 534 Dick, J. T., M. Freeman, J. Provan, and N. Reid. 2010. First record of free-living Reeves'  
535 muntjac deer (*Muntiacus reevesi* (Ogilby 1839)) in Northern Ireland. *The Irish*  
536 *Naturalists' Journal* **31**:151-151.
- 537 Dorazio, R. M. 2014. Accounting for imperfect detection and survey bias in statistical  
538 analysis of presence-only data. *Global Ecology and Biogeography* **23**:1472-1484.
- 539 Drennan, M., A. Carson, and S. Crosse. 2005. Overview of animal production from pastures  
540 in Ireland. Utilisation of grazed grass in temperate animal systems. *.in a satellite*  
541 *workshop of the XXth International Grassland Congress, Cork.*
- 542 Elith, J., C. H. Graham, R. P. Anderson, M. Dudík, S. Ferrier, A. Guisan, R. J. Hijmans, F.  
543 Huettmann, J. R. Leathwick, A. Lehmann, J. Li, L. G. Lohmann, B. A. Loiselle, G.  
544 Manion, C. Moritz, M. Nakamura, Y. Nakazawa, J. McC. M. Overton, A. Townsend  
545 Peterson, S. J. Phillips, K. Richardson, R. Scachetti-Pereira, R. E. Schapire, J.  
546 Soberón, S. Williams, M. S. Wisz, and N. E. Zimmermann. 2006. Novel methods  
547 improve prediction of species' distributions from occurrence data. *Ecography* **29**:129-  
548 151.
- 549 Elith, J., and J. R. Leathwick. 2009. Species Distribution Models: Ecological Explanation and  
550 Prediction Across Space and Time. *Annual Review of Ecology, Evolution, and*  
551 *Systematics* **40**:677-697.
- 552 European Union, Copernicus Land Monitoring Service, 2018. European Environment  
553 Agency.

- 554 Forsyth, D. M., S. Comte, N. E. Davis, A. J. Bengsen, S. D. Côté, D. G. Hewitt, N. Morellet,  
555 and A. Mysterud. 2022. Methodology matters when estimating deer abundance: a  
556 global systematic review and recommendations for improvements. *The Journal of*  
557 *Wildlife Management*.
- 558 Frans, V. F., A. A. Augé, J. Fyfe, Y. Zhang, N. McNally, H. Edelhoff, N. Balkenhol, and J.  
559 O. Engler. 2021. Integrated SDM database: Enhancing the relevance and utility of  
560 species distribution models in conservation management. *Methods in Ecology and*  
561 *Evolution* **13**:243-261.
- 562 Gortázar, C., R. J. Delahay, R. A. McDonald, M. Boadella, G. J. Wilson, D. Gavier-Widen,  
563 and P. Acevedo. 2012. The status of tuberculosis in European wild mammals.  
564 *Mammal Review* **42**:193-206.
- 565 Guillera-Aroita, G., J. J. Lahoz-Monfort, J. Elith, A. Gordon, H. Kujala, P. E. Lentini, M. A.  
566 McCarthy, R. Tingley, and B. A. Wintle. 2015. Is my species distribution model fit  
567 for purpose? Matching data and models to applications. *Global Ecology and*  
568 *Biogeography* **24**:276-292.
- 569 Guisan, A., and W. Thuiller. 2005. Predicting species distribution: offering more than simple  
570 habitat models. *Ecology Letters* **8**:993-1009.
- 571 Guisan, A., and N. E. Zimmermann. 2000. Predictive habitat distribution models in ecology.  
572 *Ecological Modelling* **135**:147-186.
- 573 Hijmans, R. J. 2021. raster: geographic data analysis and modeling. R package version 3.4-  
574 10.
- 575 Hortal, J., and J. M. Lobo. 2005. An ED-based Protocol for Optimal Sampling of  
576 Biodiversity. *Biodiversity and Conservation* **14**:2913-2947.

- 577 Isaac, N. J. B., M. A. Jarzyna, P. Keil, L. I. Dambly, P. H. Boersch-Supan, E. Browning, S.  
578 N. Freeman, N. Golding, G. Guillera-Arroita, P. A. Henrys, S. Jarvis, J. Lahoz-  
579 Monfort, J. Pagel, O. L. Pescott, R. Schmucki, E. G. Simmonds, and R. B. O'Hara.  
580 2019. Data Integration for Large-Scale Models of Species Distributions. *Trends in*  
581 *Ecology & Evolution* **0**:1-12.
- 582 Krausman, P. R., and V. C. Bleich. 2013. Conservation and management of ungulates in  
583 North America. *International Journal of Environmental Studies* **70**:372-382.
- 584 Langbein, J., R. Putman, and B. Pokorny. 2011. Traffic collisions involving deer and other  
585 ungulates in Europe and available measures for mitigation. Pages 215-259 in M.  
586 Apollonio, R. Andersen, and R. Putman, editors. *Ungulate Management in Europe:*  
587 *Problems and Practices*. Cambridge University Press, Cambridge.
- 588 Lezama-Ochoa, N., M. G. Pennino, M. A. Hall, J. Lopez, and H. Murua. 2020. Using a  
589 Bayesian modelling approach (INLA-SPDE) to predict the occurrence of the Spinetail  
590 Devil Ray (*Mobular mobular*). *Scientific Reports* **10**:18822.
- 591 Lindgren, F., H. Rue, and J. Lindström. 2011. An explicit link between Gaussian fields and  
592 Gaussian Markov random fields: the stochastic partial differential equation approach.  
593 *Journal of the Royal Statistical Society: Series B (Statistical Methodology)* **73**:423-  
594 498.
- 595 Linnell, J. D. C., B. Cretois, E. B. Nilsen, C. M. Rolandsen, E. J. Solberg, V. Veiberg, P.  
596 Kaczensky, B. Van Moorter, M. Panzacchi, G. R. Rauset, and B. Kaltenborn. 2020.  
597 The challenges and opportunities of coexisting with wild ungulates in the human-  
598 dominated landscapes of Europe's Anthropocene. *Biological Conservation* **244**.
- 599 Linnell, J. D. C., and F. E. Zachos. 2011. Status and distribution patterns of European  
600 ungulates: genetics, population history and conservation. Pages 12-53 in M.

- 601 Apollonio, R. Andersen, and R. Putman, editors. Ungulate Management in Europe:  
602 Problems and Practices. Cambridge University Press, Cambridge.
- 603 Liu, Y., and M. Nieuwenhuis. 2014. An analysis of habitat-use patterns of fallow and sika  
604 deer based on culling data from two estates in Co. Wicklow. *Irish Forestry* **71**:27 - 49.
- 605 Liu, Y., and M. Nieuwenhuis. 2018. The effect of roadside land-use on the occurrence of deer  
606 vehicle collisions. *Irish Forestry* **75**:8-25.
- 607 Lobo, J. M., A. Jiménez-Valverde, and J. Hortal. 2010. The uncertain nature of absences and  
608 their importance in species distribution modelling. *Ecography* **33**:103-114.
- 609 McDevitt, A. D., C. J. Edwards, P. O'Toole, P. O'Sullivan, C. O'Reilly, and R. F. Carden.  
610 2009. Genetic structure of, and hybridisation between, red (*Cervus elaphus*) and sika  
611 (*Cervus nippon*) deer in Ireland. *Mammalian Biology* **74**:263-273.
- 612 Miller, D. A. W., K. Pacifici, J. S. Sanderlin, B. J. Reich, and B. Gardner. 2019. The recent  
613 past and promising future for data integration methods to estimate species'  
614 distributions. *Methods in Ecology and Evolution* **10**:22-37.
- 615 Millsbaugh, J. J., J. R. Skalski, R. L. Townsend, D. R. Diefenbach, M. S. Boyce, L. P.  
616 Hansen, and K. Kammermeyer. 2009. An Evaluation of Sex-Age-Kill (SAK) Model  
617 Performance. *Journal of Wildlife Management* **73**:442-451.
- 618 Milner, J. M., C. Bonenfant, A. Mysterud, J.-M. Gaillard, S. Csányi, and N. C. Stenseth.  
619 2006. Temporal and spatial development of red deer harvesting in Europe: biological  
620 and cultural factors. *Journal of Applied Ecology* **43**:721-734.
- 621 Nagy-Reis, M., J. R. Reimer, M. A. Lewis, W. F. Jensen, and M. S. Boyce. 2021. Aligning  
622 population models with data: Adaptive management for big game harvests. *Global  
623 Ecology and Conservation* **26**.

- 624 Northern Ireland Statistics and Research Agency. 2021. Statistical Review of Northern  
625 Ireland Agriculture 2020. Department of Agriculture, Environment and Rural Affairs.
- 626 Nyhus, P. J. 2016. Human–Wildlife Conflict and Coexistence. *Annual Review of*  
627 *Environment and Resources* **41**:143-171.
- 628 O'Mara, F. P. 2012. The role of grasslands in food security and climate change. *Annals of*  
629 *Botany* **110**:1263-1270.
- 630 O'Mara, F. P. 2012. The role of grasslands in food security and climate change. *Annals of*  
631 *Botany* **110**:1263-1270.
- 632 Obidziński, A., P. Kiełtyk, J. Borkowski, L. Bolibok, and K. Remuszko. 2013. Autumn-  
633 winter diet overlap of fallow, red, and roe deer in forest ecosystems, Southern Poland.  
634 *Open Life Sciences* **8**:8-17.
- 635 Open Street Map contributors, 2017. Planet dump. Retrieved in January 2022 from  
636 <https://planet.osm.org>
- 637 Pacifici, K., B. J. Reich, D. A. W. Miller, B. Gardner, G. Stauffer, S. Singh, A. McKerrow,  
638 and J. A. Collazo. 2017. Integrating multiple data sources in species distribution  
639 modeling: a framework for data fusion. *Ecology* **98**:840-850.
- 640 Paradinas, I., D. Conesa, A. López-Quílez, and J. M. Bellido. 2017. Spatio-Temporal model  
641 structures with shared components for semi-continuous species distribution  
642 modelling. *Spatial Statistics* **22**:434-450.
- 643 Pebesma, E. J. 2018. Simple Features for R: standardized support for spatial vector data. *The*  
644 *R Journal* **10**:439-446.
- 645 Powerscourt, V. 1884. On the Acclimatization of the Japanese Deer at Powerscourt.  
646 *Proceedings of the Zoological Society of London* **52**:207-209.

- 647 Purser, P., F. Wilson, and R. F. Carden. 2010. Deer and forestry in Ireland: a review of  
648 current status and management requirements., Coillearnacha Dúchasacha (Woodlands  
649 of Ireland) steering committee, Dublin, Ireland.
- 650 Putman, R., M. Apollonio, and R. Andersen. 2011. Ungulate Management in Europe:  
651 Problems and Practices. Cambridge University Press, Cambridge.
- 652 Richardson, S., A. C. Mill, D. Davis, D. Jam, and A. I. Ward. 2020. A systematic review of  
653 adaptive wildlife management for the control of invasive, non-native mammals, and  
654 other human–wildlife conflicts. *Mammal Review* **50**:147-156.
- 655 Rue, H., S. Martino, and N. Chopin. 2009. Approximate Bayesian inference for latent  
656 Gaussian models by using integrated nested Laplace approximations. *Journal of the*  
657 *Royal Statistical Society. Series B: Statistical Methodology* **71**:319-392.
- 658 Simmonds, E. G., S. G. Jarvis, P. A. Henrys, N. J. B. Isaac, and R. B. O'Hara. 2020. Is more  
659 data always better? A simulation study of benefits and limitations of integrated  
660 distribution models. *Ecography* **43**:1413-1422.
- 661 Simpson, D. P., H. Rue, T. G. Martins, A. Riebler, and S. H. Sørbye. 2014. Penalising model  
662 component complexity: A principled, practical approach to constructing priors.  
663 *Statistical Science* **32**:1-42.
- 664 Smith, S. L., R. F. Carden, B. Coad, T. Birkitt, and J. M. Pemberton. 2014. A survey of the  
665 hybridisation status of *Cervus* deer species on the island of Ireland. *Conservation*  
666 *genetics* **15**:823-835.
- 667 Spake, R., C. Bellamy, R. Gill, K. Watts, T. Wilson, B. Ditchburn, F. Eigenbrod, and J.  
668 Bennett. 2020. Forest damage by deer depends on cross-scale interactions between



- 669 climate, deer density and landscape structure. *Journal of Applied Ecology* **57**:1376-  
670 1390.
- 671 Venter, O., E. W. Sanderson, A. Magrath, J. R. Allan, J. Beher, K. R. Jones, H. P.  
672 Possingham, W. F. Laurance, P. Wood, B. M. Fekete, M. A. Levy, and J. E. Watson.  
673 2016. Sixteen Years of Change in the Global Terrestrial Human Footprint and  
674 Implications for Biodiversity Conservation. *Nature Communications*:12558.
- 675 Venter, O., E. W. Sanderson, A. Magrath, J. R. Allan, J. Beher, K. R. Jones, H. P.  
676 Possingham, W. F. Laurance, P. Wood, B. M. Fekete, M. A. Levy, and J. E. Watson.  
677 2018. Last of the Wild Project, Version 3 (LWP-3): 2009 Human Footprint, 2018  
678 Release. NASA Socioeconomic Data and Applications Center (SEDAC), Palisades,  
679 NY.
- 680 Ward, A. I. 2005. Expanding ranges of wild and feral deer in Great Britain. *Mammal Review*  
681 **35**:165-173.
- 682 Ward, A. I., S. Richardson, and J. Mergeay. 2021. Reeves' muntjac populations continue to  
683 grow and spread across Great Britain and are invading continental Europe. *European*  
684 *Journal of Wildlife Research* **67**.
- 685 Williams, B. K. 2011. Adaptive management of natural resources--framework and issues. *J*  
686 *Environ Manage* **92**:1346-1353.
- 687 Yackulic, C. B., R. Chandler, E. F. Zipkin, J. A. Royle, J. D. Nichols, E. H. Campbell Grant,  
688 S. Veran, and R. B. O'Hara. 2013. Presence-only modelling using MAXENT: when  
689 can we trust the inferences? *Methods in Ecology and Evolution* **4**:236-243.

690

691
